# Supplementary material for: Mutation Analysis of 16 Mucolipidosis II and III Alpha/Beta Chinese Children Revealed Genotype-Phenotype Correlations
Source: PubMed Central journal article supplement (PMC5035076; doi:10.1371/journal.pone.0163204), 2016-09-23

# The mutations of ML patients

Total number: 15

c.1090C>T

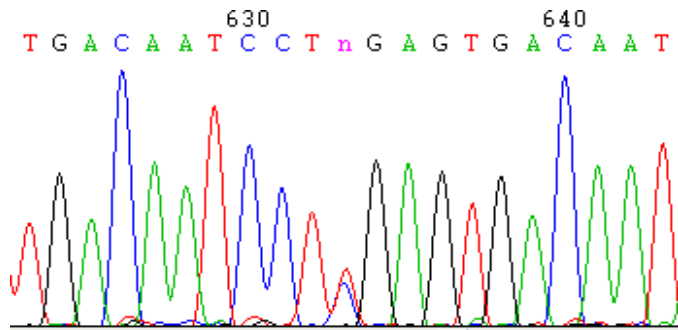

c.2541-2545delAAAAG

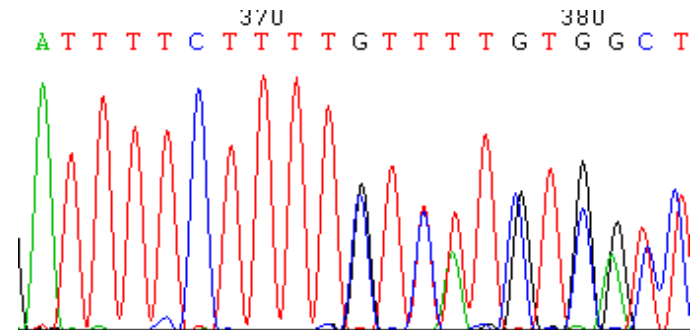

c.1212C>G

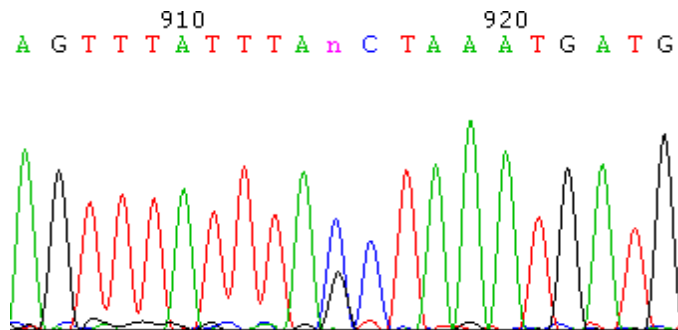

c.2715+1G>A

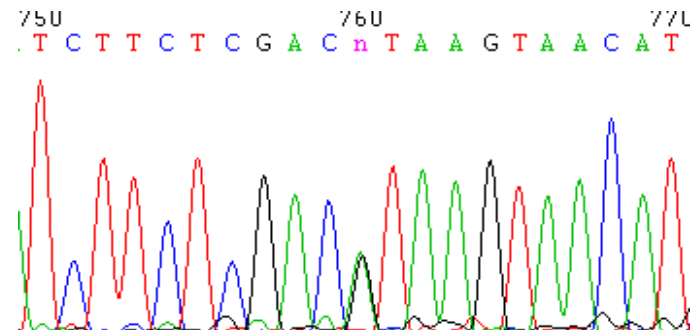

### c.98delC

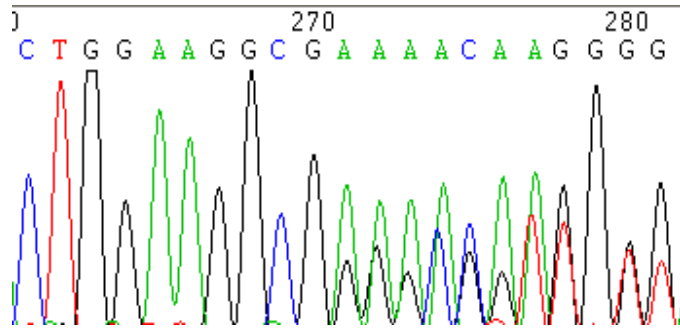

### c.2455G>T

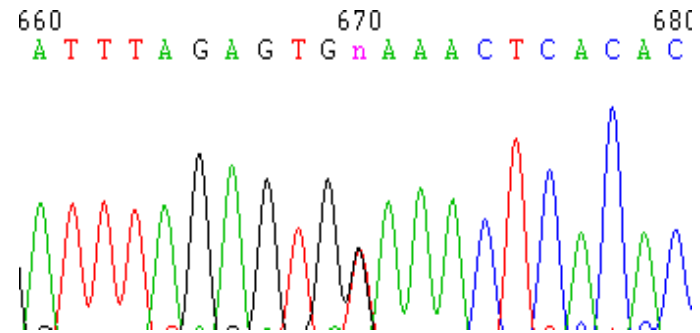

### c.2219C>A

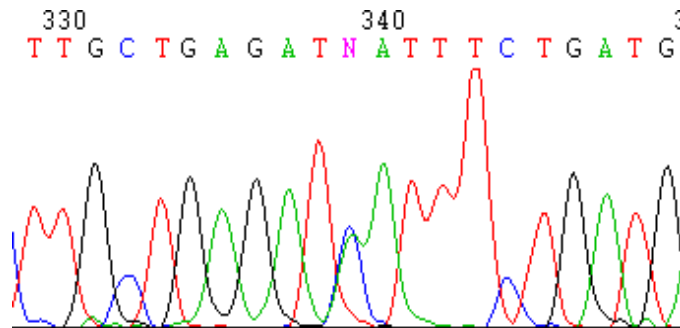

### c.3613C>T

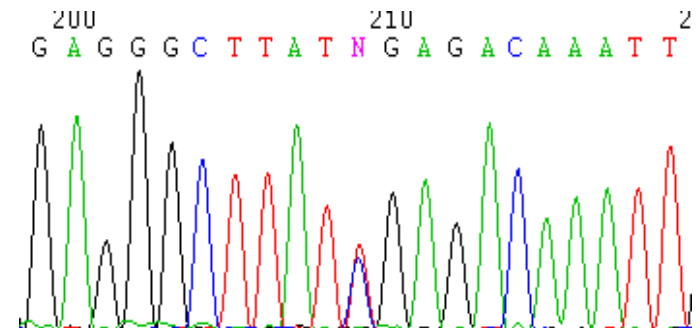

c.1071G>A

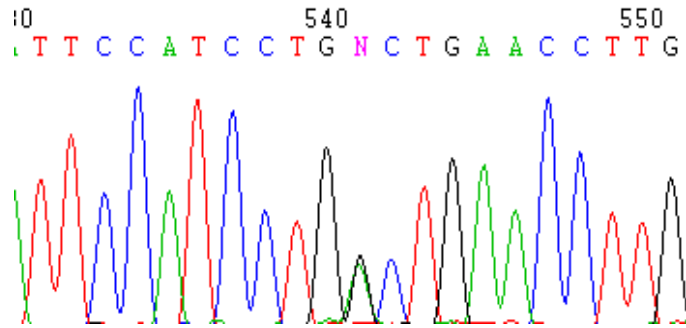

c.2822dupA

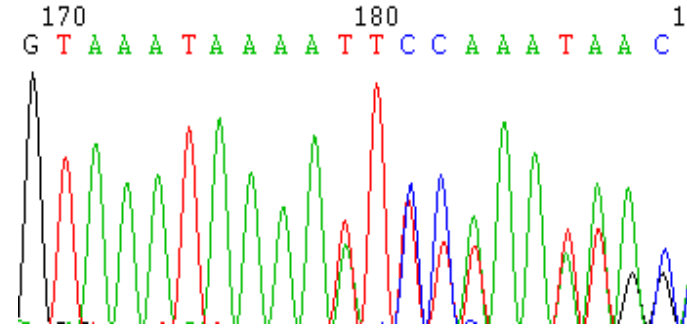

c.3136-2A>G

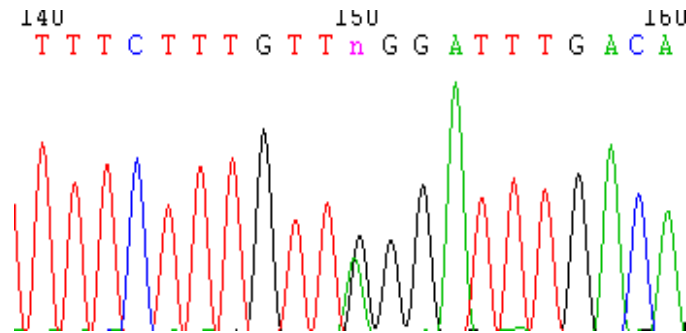

c.523\_525delAAinsG

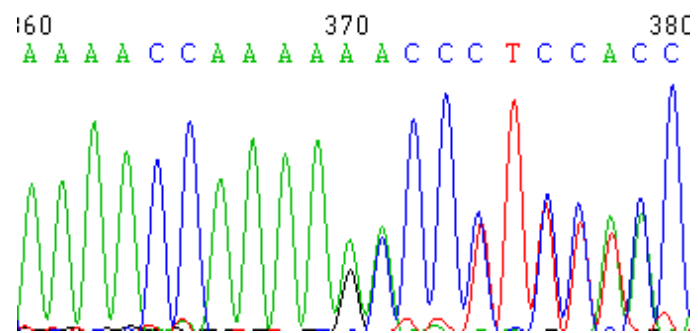

c.118-1G>A

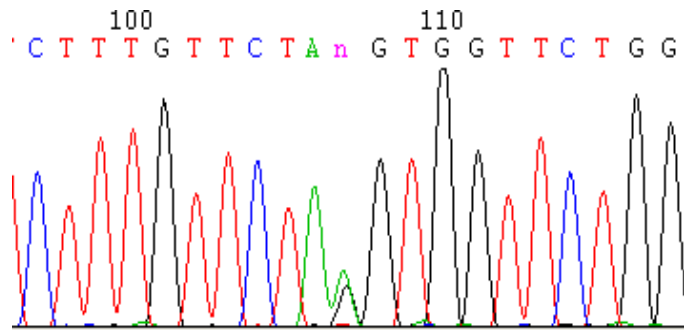

c.2345C>T

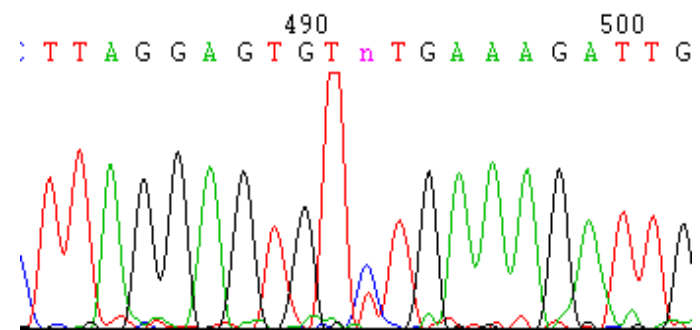

c.2356C>T

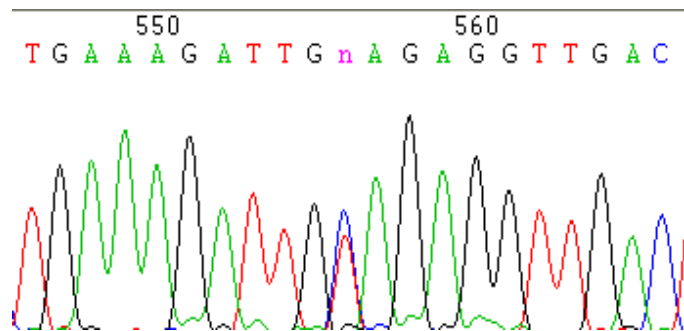

Supplement: pone.0163204.s001.pdf [file pone.0163204.s001.pdf]
